# Supplementary material
Source: PubMed Central journal article supplement (PMC4643723)
Supplement: NIHMS735367-supplement-Supplements.pdf [file NIHMS735367-supplement-Supplements.pdf]

Supplemental Table S1. Antibodies.

| Antibody to                            | Type       | Company                   | Cat. No.   | Assays         |
|----------------------------------------|------------|---------------------------|------------|----------------|
| Mouse CD45R (B220), biotin-conjugated  | Rat mAb    | eBioscience               | 13-0452    | FCM            |
| Mouse CD45R (B220), PE-conjugated      | Rat mAb    | eBioscience               | 12-0452    | FCM            |
| Mouse CD45R (B220), FITC-conjugated    | Rat mAb    | eBioscience               | 11-0452    | FCM, IF        |
| Mouse CD45R (B220), APC-conjugated     | Rat mAb    | eBioscience               | 17-0452    | FCM            |
| Mouse CD19, PE-conjugated              | Rat mAb    | eBioscience               | 12-0193    | FCM            |
| Mouse IgM, FITC-conjugated             | Rat mAb    | BD Biosciences            | 553437     | FCM            |
| Mouse IgG1, FITC-conjugated            | Rat mAb    | BD Biosciences            | 553443     | FCM            |
| Mouse IgG1, APC-conjugated             | Rat mAb    | BD Biosciences            | 550874     | FCM            |
| Mouse IgG2a, biotin-conjugated         | Rat mAb    | BD Biosciences            | 553388     | FCM            |
| Mouse IgG3, FITC-conjugated            | Rat mAb    | BD Biosciences            | 553403     | FCM            |
| Mouse IgA, FITC-conjugated             | Rat mAb    | BD Biosciences            | 559354     | FCM            |
| Mouse IgA, biotin-conjugated           | Goat pAb   | Southern Biotech          | 1040-08    | FCM, ELISA     |
| Mouse IgE, PE-conjugated               | Rat mAb    | eBioscience               | 12-5992-81 | FCM            |
| Mouse CD138, biotin-conjugated         | Rat mAb    | BD Biosciences            | 553713     | FCM            |
| Mouse CD5, FITC-conjugated             | Rat mAb    | eBioscience               | 11-0051    | FCM            |
| Mouse CD3, FITC-conjugated             | Rat mAb    | BioLegend                 | 100204     | FCM            |
| Mouse CD4, PE-conjugated               | Rat mAb    | eBioscience               | 12-0041    | FCM            |
| Mouse CD8, APC-conjugated              | Rat mAb    | eBioscience               | 17-0081    | FCM            |
| Mouse Ig, unconjugated                 | Goat pAb   | Southern Biotech          | 1010-08    | ELISA          |
| Mouse IgG, unconjugated                | Goat pAb   | Southern Biotech          | 1030-08    | ELISA          |
| Mouse IgE, unconjugated                | Goat pAb   | Bethyl                    | A90-1158   | ELISA          |
| Mouse IgM, biotin-conjugated           | Goat pAb   | Southern Biotech          | 1022-08    | ELISA, ELISPOT |
| Mouse IgG1, biotin-conjugated          | Goat pAb   | Southern Biotech          | 1070-08    | ELISA, ELISPOT |
| Mouse IgG2a, biotin-conjugated         | Goat pAb   | Southern Biotech          | 1080-08    | ELISA          |
| Mouse IgG2b, biotin-conjugated         | Rat mAb    | Biolegend                 | 406704     | ELISA          |
| Mouse IgG3, biotin-conjugated          | Goat pAb   | Southern Biotech          | 1100-08    | ELISA          |
| Mouse IgE, biotin-conjugated           | Goat pAb   | Southern Biotech          | 1110-08    | ELISA          |
| Rabbit IgG, Alexa Fluor 647-conjugated | Goat pAb   | Life Technologies         | A21244     | IF             |
| Mouse Rab7                             | Rabbit mAb | Abcam                     | ab137029   | IB, IF         |
| Mouse CD40                             | Rat mAb    | Abcam                     | ab25298    | IF             |
| Mouse LC3                              | Rabbit pAb | Abcam                     | ab58610    | IB             |
| Mouse phospho-NF- $\kappa$ B p65       | Rabbit mAb | Cell Signaling Technology | 3033       | IB             |
| Mouse NF- $\kappa$ B p65               | Rabbit mAb | Cell Signaling Technology | 4764       | IB             |
| Mouse NF- $\kappa$ B p52 (and p100)    | Rabbit pAb | Santa Cruz Biotechnology  | sc-298     | IB             |
| Mouse phospho-p38                      | Rabbit mAb | Cell Signaling Technology | 4511       | IB             |
| Mouse p38                              | Rabbit mAb | Cell Signaling Technology | 8690       | IB             |
| Mouse phospho-ERK1/2                   | Rabbit mAb | Cell Signaling Technology | 4370       | IB             |
| Mouse ERK1/2                           | Rabbit mAb | Cell Signaling Technology | 4695       | IB             |
| Mouse AID                              | Mouse mAb  | Invitrogen                | 39-2500    | IB             |
| Mouse Blimp-1                          | Rat mAb    | eBioscience               | 14-5963-82 | IB             |
| Mouse $\beta$ -actin                   | Mouse mAb  | Sigma                     | A5441      | IB             |

Abbreviations: mAb, monoclonal antibody; pAb, polyclonal antibody; ELISA, enzyme-linked immunosorbent assay; ELISPOT, enzyme-linked immunosorbent spot; FCM, flow cytometry; IB, immunoblotting; IF, immunofluorescence microscopy.

Supplemental Table S2. Oligonucleotide sequences.

|            |                                     | Forward primer                    | Reverse primer                    |
|------------|-------------------------------------|-----------------------------------|-----------------------------------|
| qRT-PCR    | <i>CD79b</i>                        | 5'- TGTTGGAATCTGCAAATGGA -3'      | 5'- TAGGCTTTGGGTGATCCTTG -3'      |
|            | <i>Iγ1-Cγ1</i>                      | 5'- TCGAGAAGCCTGAGGAATGTG -3'     | 5'- ATGGAGTTAGTTTGGGCAGCA -3'     |
|            | <i>Iγ1-Cμ</i>                       | 5'- TCGAGAAGCCTGAGGAATGTG -3'     | 5'- GGTACTTGCCCCCTGTCCTCAG -3'    |
|            | <i>Iμ-Cγ1</i>                       | 5'- ACCTGGGAATGTATGGTTGTGGCTT -3' | 5'- ATGGAGTTAGTTTGGGCAGCA -3'     |
|            | <i>Iε-Cε</i>                        | 5'- ACTAGAGATTCACAACG -3'         | 5'- AGCGATGAATGGAGTAGC -3'        |
|            | <i>Iμ-Cε</i>                        | 5'- ACCTGGGAATGTATGGTTGTGGCTT -3' | 5'- AGCGATGAATGGAGTAGC -3'        |
|            | <i>Iε-Cμ</i>                        | 5'- ACTAGAGATTCACAACG -3'         | 5'- GGTACTTGCCCCCTGTCCTCAG -3'    |
|            | <i>Aicda</i>                        | 5'- AGAAA GTCAC GCTGG AGACC -3'   | 5'- CTCCTCTTCACCACGTAGCA -3'      |
|            | <i>14-3-3γ</i>                      | 5'- GGCCGCGGCCATGAAGAACG -3'      | 5'- GGAGCGGCGAGCCCCCACCACG -3'    |
|            | <i>Prdm1</i>                        | 5'- TTCTCTTGAAAAACGTGTGGG -3'     | 5'- GGAGCCGGAGCTAGACTTG -3'       |
|            | <i>Xbp1</i>                         | 5'- AAGCCCGGATGAGCGAGCTG -3'      | 5'- ACCCGGCCACCAGCCTTACT -3'      |
|            | <i>Becn1</i>                        | 5'- ATGGAGGGGTCTAAGGCGTC -3'      | 5'- TGGGCTGTGGTAAGTAATGGA -3'     |
|            | <i>Vps34</i>                        | 5'- GGGCTATACCAAGAGACATGC -3'     | 5'- CGCCTTGTAGGATGTTCTGACT -3'    |
|            | <i>LC3</i>                          | 5'- GACCGCTGTAAGGAGGTGC -3'       | 5'- AGAAGCCGAAGGTTTCTTGGG -3'     |
|            | <i>Gabarap</i>                      | 5'- AAGAGGAGCATCCGTTCGAGA -3'     | 5'- GGACCCGGTCTGGGTATTTC -3'      |
|            | <i>Atg4a</i>                        | 5'- GGGATTGGAAGTGGGAGAGAC -3'     | 5'- ACACCCATTTGTCCATCTGA -3'      |
|            | <i>Atg3</i>                         | 5'- TCCATGCTACAAGCGGTGTAA -3'     | 5'- CTTGCTTCCAGTGAATCTCCT -3'     |
| Genotyping | <i>Rab7<sup>+</sup></i> allele      | 5'- TTAGGCTGTATGTATGTGC -3'       | 5'- CTCACTCACTCCTAAATGG -3'       |
|            | <i>Rab7<sup>fl</sup></i> allele     | 5'- TTAGGCTGTATGTATGTGC -3'       | 5'- CTCACTCACTCCTAAATGG -3'       |
|            | <i>Rab7<sup>del</sup></i> allele    | 5'- GGGCTGCAGGAATTCGGATAAC -3'    | 5'- CTCACTCACTCCTAAATGG -3'       |
|            | <i>Igh<sup>+</sup></i> allele       | 5'- TGTTGGGACAAACGAGCAATC -3'     | 5'- GTCATGGCAATGCCAAGGTCGCTAG -3' |
|            | <i>Igh<sup>Cγ1-cre</sup></i> allele | 5'- GGTGGCTGGACCAATGTAAATA -3'    | 5'- GTCATGGCAATGCCAAGGTCGCTAG -3' |
